# Supplementary material
Source: PubMed Central journal article supplement (PMC2857685)
Supplement: NIHMS192009-supplement-1.pdf [file NIHMS192009-supplement-1.pdf]

## Supporting Information

# Mass Spectrometric Characterization of Protein Modification by the Products of Non-Enzymatic Oxidation of Linoleic Acid

Xiaochun Zhu<sup>†</sup>, Xiaoxia Tang, Vernon E Anderson<sup>‡</sup>, and Lawrence M. Sayre<sup>\*·†</sup>

<sup>†</sup> Department of Chemistry, Case Western Reserve University

<sup>‡</sup> Department of Biochemistry, Case Western Reserve University

Cleveland, OH 44106

**Table S1. Modified Peptides Detected by LC-ESI-MS/MS from Chymotryptic Digest**

| Peptide sequence <sup>s</sup>                 | Position          | Mass of modified peptide   | Assignment (Mass Shift)                     |                               |
|-----------------------------------------------|-------------------|----------------------------|---------------------------------------------|-------------------------------|
| <u>H</u> IRL                                  | 146–149           | 694.4/699.4                | HNE–His MA (156/161 Da)                     |                               |
| SFNPTQLEEQC <sup>o</sup> <u>H</u> I           | 150–162           | 1758.7/1763.6              |                                             |                               |
| <u>H</u> IRL                                  | 146–149           | 766.4                      | HODA–His MA (228 Da)                        |                               |
| SFNPTQLEEQC <sup>o</sup> <u>H</u> I           | 150–162           | 1830.8                     |                                             |                               |
| VEEL <u>K</u> PTPEGDLEIL                      | 43–57             | 1835.8/1840.7              | ONE–Lys 4-Ketoamide (154/159 Da)            |                               |
| LQ <u>K</u> W                                 | 58–61             | 728.3/733.3                |                                             |                               |
| <u>K</u> IPAVF                                | 77–82             | 828.3/833.8                |                                             |                               |
| <u>K</u> IDAL                                 | 83–87             | 713.5/718.3                |                                             |                               |
| KIDALNEN <u>K</u> VL                          | 83–93             | 1410.8/1415.9              |                                             |                               |
| NEN <u>K</u> VL                               | 88–93             | 870.3/875.3                |                                             |                               |
| <u>K</u> KY                                   | 100–102           | 592.4/597.3                |                                             |                               |
| <u>K</u> KY                                   | 100–102           | 592.5/597.5                |                                             |                               |
| VRTPEVDDEALE <u>K</u> F                       | 123–136           | 1801.9/1806.8              |                                             |                               |
| D <u>K</u> AL                                 | 137–140           | 600.6/605.5                |                                             |                               |
| VEEL <u>K</u> PTPEGDLEIL                      | 43–57             | 1907.6                     |                                             | DODE–Lys 4-Ketoamide (226 Da) |
| LQ <u>K</u> W                                 | 58–61             | 800.4                      |                                             |                               |
| <u>K</u> IPAVF                                | 77–82             | 900.5                      |                                             |                               |
| <u>K</u> IDAL                                 | 83–87             | 785.4                      |                                             |                               |
| KIDALNEN <u>K</u> VL                          | 83–93             | 1482.8                     |                                             |                               |
| NEN <u>K</u> VL                               | 88–93             | 942.3                      |                                             |                               |
| <u>K</u> KY                                   | 100–102           | 664.5                      |                                             |                               |
| <u>K</u> KY                                   | 100–102           | 664.4                      |                                             |                               |
| VRTPEVDDEALE <u>K</u> F                       | 123–136           | 1874.1                     |                                             |                               |
| D <u>K</u> AL                                 | 137–140           | 672.4                      |                                             |                               |
| <u>K</u> ALPM                                 | 141–145           | 785.3                      |                                             |                               |
| VRTPEVDDEALE <u>K</u> F + AC <sup>o</sup> QCL | 123–136 + 118–122 | 1180.4/1182.9 <sup>#</sup> | Cys–ONE–Lys Pyrrole Cross-link (118/123 Da) |                               |
| VRTPEVDDEALE <u>K</u> F + VC <sup>o</sup> QCL | 123–136 + 118–122 | 1194.3/1196.7 <sup>#</sup> |                                             |                               |
| VRTPEVDDEALE <u>K</u> F + <u>C</u> L          | 123–136 + 121–122 | 1001.0/1003.8 <sup>#</sup> |                                             |                               |
| VRTPEVDDEALE <u>K</u> F + AC <sup>o</sup> QCL | 123–136 + 118–122 | 1216.1 <sup>#</sup>        | Cys–DODE–Lys Pyrrole Cross-link (190 Da)    |                               |
| VRTPEVDDEALE <u>K</u> F + VC <sup>o</sup> QCL | 123–136 + 118–122 | 1230.3 <sup>#</sup>        |                                             |                               |

|                                         |                   |                            |                                                |
|-----------------------------------------|-------------------|----------------------------|------------------------------------------------|
| VRTPEVDDEALE <b>K</b> F + <b>C</b> L    | 123–136 + 121–122 | 1036.8 <sup>#</sup>        |                                                |
| <b>L</b> IVTQ + <b>H</b> IRL            | 1–5 + 146–149     | 1228.7/1233.6              | His–ONE–Lys Pyrrole Cross-link<br>(118/123 Da) |
| <b>K</b> GL + <b>H</b> IRL              | 8–10 + 146–149    | 972.5/977.5                |                                                |
| VEEL <b>K</b> PTPEGDLEIL + <b>H</b> IRL | 43–57 + 146–149   | 1169.3/1172.7 <sup>#</sup> |                                                |
| <b>K</b> IPAVF + <b>H</b> IRL           | 77–82 + 146–149   | 1329.8/1334.8              |                                                |
| <b>K</b> IDAL + <b>H</b> IRL            | 83–87 + 146–149   | 1214.6/1219.7              |                                                |
| KIDALNEN <b>K</b> VL + <b>H</b> IRL     | 83–93 + 146–149   | 956.7/959.3 <sup>#</sup>   |                                                |
| <b>K</b> KY + <b>H</b> IRL              | 100–102 + 146–149 | 1093.4/1098.5              |                                                |
| <b>K</b> KY + <b>H</b> IRL              | 100–102 + 146–149 | 1093.6/1098.7              |                                                |
| VRTPEVDDEALE <b>K</b> F + <b>H</b> IRL  | 123–136 + 146–149 | 1152.4/1154.7 <sup>#</sup> |                                                |
| <b>D</b> KAL + <b>H</b> IRL             | 137–140 + 146–149 | 1101.6/1106.7              |                                                |
| <b>L</b> IVTQ + <b>H</b> IRL            | 1–5 + 146–149     | 1301.1                     | His–DODE–Lys Pyrrole Cross-link<br>(190 Da)    |
| <b>K</b> GL + <b>H</b> IRL              | 8–10 + 146–149    | 1045.1                     |                                                |
| VEEL <b>K</b> PTPEGDLEIL + <b>H</b> IRL | 43–57 + 146–149   | 1205.4 <sup>#</sup>        |                                                |
| <b>K</b> IPAVF + <b>H</b> IRL           | 77–82 + 146–149   | 1401.6                     |                                                |
| <b>K</b> IDAL + <b>H</b> IRL            | 83–87 + 146–149   | 1286.7                     |                                                |
| KIDALNEN <b>K</b> VL + <b>H</b> IRL     | 83–93 + 146–149   | 992.5                      |                                                |
| <b>K</b> KY + <b>H</b> IRL              | 100–102 + 146–149 | 1165.7                     |                                                |
| VRTPEVDDEALE <b>K</b> F + <b>H</b> IRL  | 123–136 + 146–149 | 1188.8 <sup>#</sup>        |                                                |
| <b>D</b> KAL + <b>H</b> IRL             | 137–140 + 146–149 | 1173.5                     |                                                |
| VEEL <b>K</b> PTPEGDLEIL                | 43–57             | 1817.7/1822.7              |                                                |
| <b>L</b> Q <b>K</b> W                   | 58–61             | 710.3/715.2                |                                                |
| <b>K</b> IPAVF                          | 77–82             | 810.5/815.5                |                                                |
| <b>K</b> IDAL                           | 83–87             | 695.4/699.4                |                                                |
| KIDALNEN <b>K</b> VL                    | 83–93             | 1392.5/1397.4              |                                                |
| NEN <b>K</b> VL                         | 88–93             | 852.4/857.5                |                                                |
| <b>K</b> KY                             | 100–102           | 574.3/579.3                |                                                |
| <b>K</b> KY                             | 100–102           | 574.4/679.3                |                                                |
| VRTPEVDDEALE <b>K</b> F                 | 123–136           | 1783.8/1788.8              |                                                |
| VEEL <b>K</b> PTPEGDLEIL                | 43–57             | 1889.6                     |                                                |
| <b>L</b> Q <b>K</b> W                   | 58–61             | 782.6                      | DODE–Lys Pyrrolinone (208 Da)                  |
| <b>K</b> IPAVF                          | 77–82             | 882.5                      |                                                |
| <b>K</b> IDAL                           | 83–87             | 767.5                      |                                                |
| KIDALNEN <b>K</b> VL                    | 83–93             | 1464.6                     |                                                |
| NEN <b>K</b> VL                         | 88–93             | 924.3                      |                                                |
| <b>K</b> KY                             | 100–102           | 646.4                      |                                                |
| <b>K</b> KY                             | 100–102           | 646.4                      |                                                |
| VRTPEVDDEALE <b>K</b> F                 | 123–136           | 1855.7                     |                                                |
| <b>D</b> KAL                            | 137–140           | 654.2                      |                                                |
| KIDALNEN <b>K</b> VL                    | 83–93             | 1354.7/1359.7              |                                                |
| KIDALNEN <b>K</b> VL                    | 83–93             | 1426.7                     | CA N <sup>ε</sup> -Hexanoyllysine (170 Da)     |
| <b>H</b> IRL                            | 146–149           | 664.5/669.7                | Octenal–His MA (126/131 Da)                    |
| <b>H</b> IRL                            | 146–149           | 736.8                      | OUEA–His MA (198 Da)                           |
| <b>H</b> IRL                            | 146–149           | 680.3/685.5                | 2-Octenoic acid–His MA (142/147 Da)            |
| <b>H</b> IRL                            | 146–149           | 752.4                      | 2-Octenoic acid CA–His MA (214 Da)             |
| <b>H</b> IRL                            | 146–149           | 708.6/713.6                | ONEA–His MA (170/175 Da)                       |
| <b>H</b> IRL                            | 146–149           | 832.5/837.6                | KODDE–His MA (294/299 Da)                      |
| <b>H</b> IRL                            | 146–149           | 848.4/853.7                | EKODE–His MA (310/315 Da)                      |
| <b>H</b> IRL                            | 146–149           | 850.7/855.7                | HKODE–His MA (312/317 Da)                      |
| <b>H</b> IRL                            | 146–149           | 866.8/871.7                | DHKODE–His MA (328/333 Da)                     |
| <b>H</b> IRL                            | 146–149           | 884.5/889.6                | His Unknown (346/351 Da)                       |

‡: bold and underlined residue was modified; \*: Cys was S-carboxyamidomethylated with iodoacetamide; #: doubly charged peak; CA: carboxy analog, which is the corresponding cOCP partner of ωOCP.

**Table S2. Modified Peptides Detected by LC-ESI-MS/MS from Tryptic Digest**

| Peptide sequence <sup>§</sup> | Position | Mass of modified | Assignment (Mass Shift) |
|-------------------------------|----------|------------------|-------------------------|
|-------------------------------|----------|------------------|-------------------------|

|                                    |         | peptide       |                                     |
|------------------------------------|---------|---------------|-------------------------------------|
| ALPM <b>H</b> IR                   | 142–148 | 993.4/998.4   | HNE–His MA (156/161 Da)             |
| ALPMo <b>H</b> IR                  | 142–148 | 1009.3/1014.3 |                                     |
| ALPM <b>H</b> IR                   | 142–148 | 1065.6        | HODA–His MA (228 Da)                |
| ALPMo <b>H</b> IR                  | 142–148 | 1081.3        |                                     |
| <b>L</b> IVTQ <b>T</b> MK          | 1–8     | 1087.4/1092.4 | ONE–Lys 4-Ketoamide (154/159 Da)    |
| <b>L</b> IVTQ <b>T</b> Mo <b>K</b> | 1–8     | 1103.4/1108.4 |                                     |
| <b>K</b> IAEK                      | 70–75   | 855.3/860.5   |                                     |
| <b>T</b> KIPAV <b>F</b> K          | 76–83   | 1057.3/1062.6 |                                     |
| <b>F</b> D <b>K</b> AL <b>K</b>    | 136–141 | 875.3/880.4   |                                     |
| <b>L</b> IVTQ <b>T</b> MK          | 1–8     | 1159.4        | DODE–Lys 4-Ketoamide (226 Da)       |
| <b>L</b> IVTQ <b>T</b> Mo <b>K</b> | 1–8     | 1175.3        |                                     |
| <b>K</b> IAEK                      | 70–75   | 927.4         |                                     |
| <b>T</b> KIPAV <b>F</b> K          | 76–83   | 1129.3        |                                     |
| <b>F</b> D <b>K</b> AL <b>K</b>    | 136–141 | 947.2         |                                     |
| <b>K</b> IAEK                      | 70–75   | 837.4/842.4   | ONE–Lys Pyrrolinone (136/141 Da)    |
| <b>K</b> IAEK                      | 70–75   | 909.3         | DODE–Lys Pyrrolinone (208 Da)       |
| ALPMo <b>H</b> IR                  | 142–148 | 979.3/984.4   | Octenal–His MA (126/131 Da)         |
| ALPMo <b>H</b> IR                  | 142–148 | 1051.1        | OUEA–His MA (198 Da)                |
| ALPM <b>H</b> IR                   | 142–148 | 979.3/984.4   | 2-Octenoic acid–His MA (142/147 Da) |
| ALPM <b>H</b> IR                   | 142–148 | 1051.2        | 2-Octenoic acid CA–His MA (214 Da)  |
| ALPMo <b>H</b> IR                  | 142–148 | 1163.6/1168.5 | EKODE–His (310/315 Da)              |

§: bold and underlined residue was modified; CA: carboxy analog, which is the corresponding cOCP partner of ωOCP.

**Table S3. Modified Peptides Detected by LC-ESI-MS/MS from Chymotryptic Digest after Reduction**

| Peptide sequence <sup>§</sup>                                | Position          | Mass of modified peptide    | Assignment <sup>®</sup> (Mass Shift)        |
|--------------------------------------------------------------|-------------------|-----------------------------|---------------------------------------------|
| <b>H</b> IRL                                                 | 146-149           | 696.3/701.4                 | HNE-His MA (158/163 Da)                     |
| SFNPTQL <b>E</b> EQC <b>H</b> I                              | 150-162           | 1760.4/1765.5               |                                             |
| <b>H</b> IRL                                                 | 146-149           | 768.3                       | HODA-His MA (230 Da)                        |
| SFNPTQL <b>E</b> EQC <b>H</b> I                              | 150-162           | 1832.5                      |                                             |
| VEEL <b>K</b> PTPEGDLEIL                                     | 43-57             | 1837.6/1842.9               | ONE-Lys 4-Ketoamide (156/161 Da)            |
| <b>L</b> Q <b>K</b> W                                        | 58-61             | 730.3/735.2                 |                                             |
| <b>K</b> IPAV <b>F</b>                                       | 77-82             | 830.5/835.6                 |                                             |
| <b>K</b> IDAL                                                | 83-87             | 715.2/720.1                 |                                             |
| KIDALNEN <b>K</b> V <b>L</b>                                 | 83-93             | 1412.6/1417.5               |                                             |
| <b>K</b> K <b>Y</b>                                          | 100-102           | 594.2/599.3                 |                                             |
| VRTPEVDDEALE <b>K</b> <b>F</b>                               | 123-136           | 1803.7/1808.8               |                                             |
| <b>D</b> <b>K</b> AL                                         | 137-140           | 602.1/607.1                 |                                             |
| VEEL <b>K</b> PTPEGDLEIL                                     | 43-57             | 1909.6                      | KODA-Lys 4-Ketoamide (228 Da)               |
| <b>L</b> Q <b>K</b> W                                        | 58-61             | 802.3                       |                                             |
| <b>K</b> IPAV <b>F</b>                                       | 77-82             | 902.3                       |                                             |
| <b>K</b> IDAL                                                | 83-87             | 787.2                       |                                             |
| KIDALNEN <b>K</b> V <b>L</b>                                 | 83-93             | 1484.6                      |                                             |
| NEN <b>K</b> V <b>L</b>                                      | 88-93             | 944.2                       |                                             |
| <b>K</b> K <b>Y</b>                                          | 100-102           | 666.2                       |                                             |
| <b>K</b> K <b>Y</b>                                          | 100-102           | 666.2                       |                                             |
| VRTPEVDDEALE <b>K</b> <b>F</b>                               | 123-136           | 1875.6                      |                                             |
| <b>D</b> <b>K</b> AL                                         | 137-140           | 674.1                       |                                             |
| VRTPEVDDEALE <b>K</b> <b>F</b> + AC <sup>†</sup> <b>Q</b> CL | 123-136 + 118-122 | 1180.5/1182.6 <sup>††</sup> | Cys-ONE-Lys Pyrrole Cross-link (118/123 Da) |
| VRTPEVDDEALE <b>K</b> <b>F</b> + <b>C</b> L                  | 123-136 + 121-122 | 1001.3/1004.3 <sup>††</sup> |                                             |
| VRTPEVDDEALE <b>K</b> <b>F</b> + AC <sup>†</sup> <b>Q</b> CL | 123-136 + 118-122 | 1216.4 <sup>††</sup>        | Cys-KODA-Lys Pyrrole Cross-link (190 Da)    |
| VRTPEVDDEALE <b>K</b> <b>F</b> + <b>C</b> L                  | 123-136 + 121-122 | 1036.2 <sup>††</sup>        |                                             |
| <b>L</b> IVTQ + <b>H</b> IRL                                 | 1-5 + 146-149     | 1228.3/1233.5               | His-ONE-Lys Pyrrole Cross-link (118/123 Da) |
| <b>K</b> GL + <b>H</b> IRL                                   | 8-10 + 146-149    | 972.2/977.5                 |                                             |
| VEEL <b>K</b> PTPEGDLEIL + <b>H</b> IRL                      | 43-57 + 146-149   | 1169.2/1172.0 <sup>††</sup> |                                             |
| <b>K</b> IDAL + <b>H</b> IRL                                 | 83-87 + 146-149   | 1214.4/1219.5               |                                             |

|                                         |                   |                            |                                            |
|-----------------------------------------|-------------------|----------------------------|--------------------------------------------|
| KIDALNEN <u>K</u> VL + <u>H</u> IRL     | 83-93 + 146-149   | 956.7/959.1 <sup>#</sup>   | His-KODA-Lys Pyrrole Cross-link (190 Da)   |
| <u>K</u> KY + <u>H</u> IRL              | 100-102 + 146-149 | 1093.3/1098.3              |                                            |
| <u>K</u> KY + <u>H</u> IRL              | 100-102 + 146-149 | 1093.5/1098.4              |                                            |
| VRTPEVDDEALE <u>K</u> F + <u>H</u> IRL  | 123-136 + 146-149 | 1152.4/1154.7 <sup>#</sup> |                                            |
| <u>D</u> KAL + <u>H</u> IRL             | 137-140 + 146-149 | 1101.7/1106.5              |                                            |
| <u>L</u> IVTQ + <u>H</u> IRL            | 1-5 + 146-149     | 1300.4                     |                                            |
| <u>K</u> GL + <u>H</u> IRL              | 8-10 + 146-149    | 1044.3                     |                                            |
| VEEL <u>K</u> PTPEGDLEIL + <u>H</u> IRL | 43-57 + 146-149   | 1205.7 <sup>#</sup>        |                                            |
| <u>K</u> IDAL + <u>H</u> IRL            | 83-87 + 146-149   | 1286.6                     |                                            |
| KIDALNEN <u>K</u> VL + <u>H</u> IRL     | 83-93 + 146-149   | 992.7 <sup>#</sup>         |                                            |
| VRTPEVDDEALE <u>K</u> F + <u>H</u> IRL  | 123-136 + 146-149 | 1188.4 <sup>#</sup>        | CA N <sup>ε</sup> -Hexanoyllysine (170 Da) |
| <u>D</u> KAL + <u>H</u> IRL             | 137-140 + 146-149 | 1173.8                     |                                            |
| VEEL <u>K</u> PTPEGDLEIL                | 43-57             | 1851.7                     | N <sup>ε</sup> -Hexanoyllysine (98/103 Da) |
| KIDALNEN <u>K</u> VL                    | 83-93             | 1354.6/1359.4              | CA N <sup>ε</sup> -Hexanoyllysine (170 Da) |
| KIDALNEN <u>K</u> VL                    | 83-93             | 1426.7                     | Octenal-His MA (128/133 Da)                |
| <u>H</u> IRL                            | 146-149           | 666.4/671.3                | OUEA-His MA (200 Da)                       |
| <u>H</u> IRL                            | 146-149           | 738.2                      | KODDE-His MA (296/301 Da)                  |
| <u>H</u> IRL                            | 146-149           | 834.4/839.0                | EKODE-His MA (312/317 Da)                  |
| <u>H</u> IRL                            | 146-149           | 850.4/855.4                | His Unknown (348/353 Da)                   |
| <u>H</u> IRL                            | 146-149           | 886.4/891.4                | 2-Octenoic acid-His MA (142/147 Da)        |
| <u>H</u> IRL                            | 146-149           | 680.7/685.6                | 2-Octenoic acid CA-His MA (214 Da)         |
| <u>H</u> IRL                            | 146-149           | 752.5                      | ONEA-His MA (172/177 Da)                   |
| <u>H</u> IRL                            | 146-149           | 710.5/715.6                | ONEA CA-His MA (244 Da)                    |
| <u>H</u> IRL                            | 146-149           | 782.5                      |                                            |

§: bold and underlined residue was modified; \*: Cys was S-carboxyamidomethylated with iodoacetamide; @: reduced form if reducible; #: doubly charged peak; CA: carboxy analog, which is the corresponding cOCP partner of ωOCP.

**Table S4. Modified Peptides Detected by LC-ESI-MS/MS from Tryptic Digest after Reduction**

| Peptide sequence <sup>§</sup> | Position | Mass of modified peptide | Assignment <sup>@</sup> (Mass Shift) |
|-------------------------------|----------|--------------------------|--------------------------------------|
| ALPM <u>H</u> IR              | 142-148  | 995.4/1000.4             | HNE-His MA (158/163 Da)              |
| ALPMo <u>H</u> IR             | 142-148  | 1011.4/1016.3            |                                      |
| ALPM <u>H</u> IR              | 142-148  | 1067.4                   | HODA-His MA (230 Da)                 |
| ALPMo <u>H</u> IR             | 142-148  | 1083.3                   |                                      |
| <u>L</u> IVTQTMK              | 1-8      | 1089.3/1094.3            | ONE-Lys 4-Ketoamide (156/161 Da)     |
| <u>L</u> IVTQTMoK             | 1-8      | 1105.4/1110.2            |                                      |
| <u>K</u> IAEK                 | 70-75    | 857.2/862.4              |                                      |
| IIAE <u>K</u> TK              | 71-77    | 958.2/963.2              |                                      |
| <u>T</u> KIPAVFK              | 76-83    | 1059.4/1064.2            |                                      |
| FD <u>K</u> ALK               | 136-141  | 877.4/882.4              |                                      |
| <u>L</u> IVTQTMK              | 1-8      | 1161.4                   |                                      |
| <u>L</u> IVTQTMoK             | 1-8      | 1177.5                   |                                      |
| <u>K</u> IAEK                 | 70-75    | 929.3                    |                                      |
| IIAE <u>K</u> TK              | 71-77    | 1030.4                   |                                      |
| <u>T</u> KIPAVFK              | 76-83    | 1131.5                   |                                      |
| FD <u>K</u> ALK               | 136-141  | 949.2                    |                                      |
| ALPM <u>H</u> IR              | 142-148  | 979.4/984.6              | 2-Octenoic acid-His MA (142/147 Da)  |
| ALPM <u>H</u> IR              | 142-148  | 1051.2                   | 2-Octenoic acid CA-His MA (214 Da)   |
| ALPM <u>H</u> IR              | 142-148  | 1149.5/1154.5            | EKODE-His MA (312/317 Da)            |
| ALPMo <u>H</u> IR             | 142-148  | 1165.3-1170.4            | EKODE-His MA (312/317 Da)            |

§: bold and underlined residue was modified; @: reduced form if reducible; CA: carboxy analog, which is the corresponding cOCP partner of ωOCP.

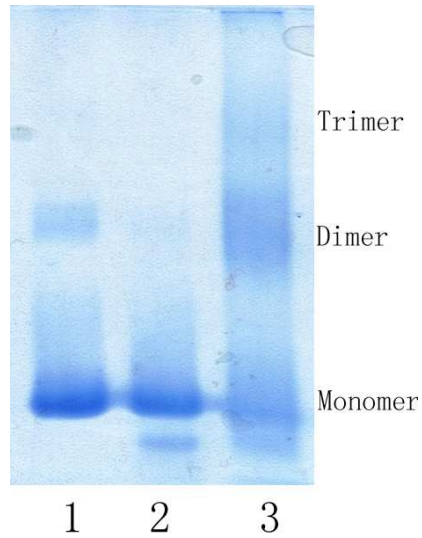

**Figure S1.** SDS-PAGE of fresh  $\beta$ -LG (lane 1), 0.1 mM  $\beta$ -LG incubated at pH 7.4 HEPES buffer at 37 °C for 3 d (lane 2) and 0.1 mM  $\beta$ -LG incubated with 5 mM LA, 1 mM Asc and 0.5 mM  $\text{FeSO}_4 \cdot (\text{NH}_4)_2\text{SO}_4$  at pH 7.4 HEPES buffer at 37 °C for 3 d (lane 3).

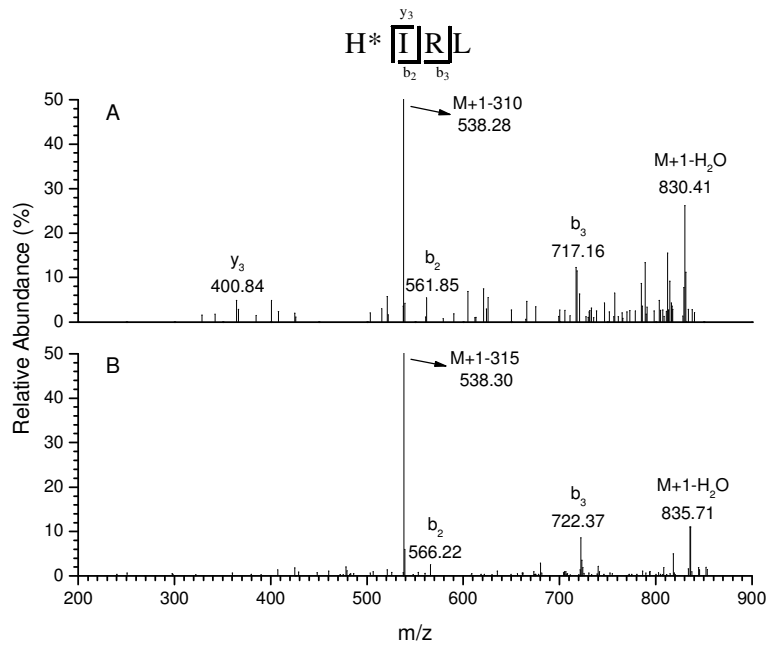

**Figure S2.** Tandem mass spectra of the modified HIRL at H146 by  $d_0$ -EKODE (A) and  $d_5$ -EKODE (B) through Michael addition.

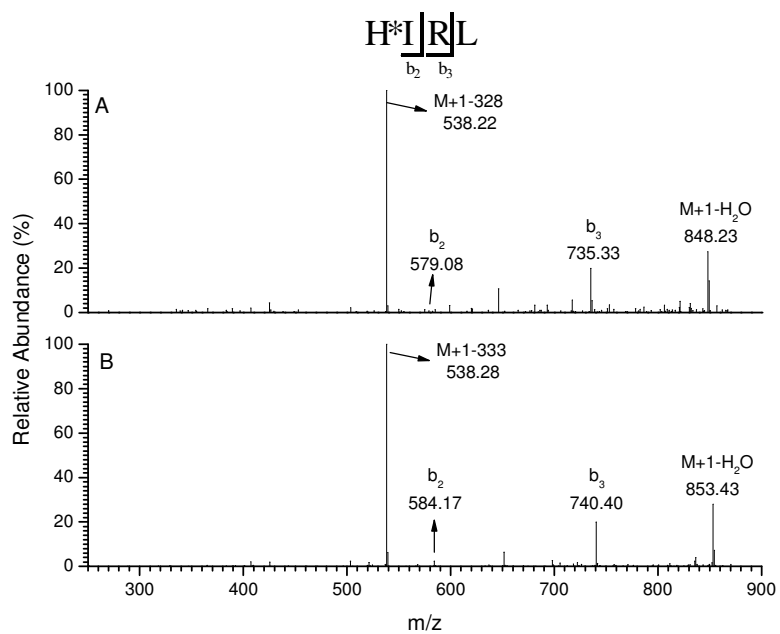

**Figure S3.** Tandem mass spectra of the modified HIRL at H146 by  $d_0$ -DHKODE (A) and  $d_5$ -DHKODE (B) through Michael addition.
